# Supplementary material
Source: PubMed Central journal article supplement (PMC3158187)
Supplement: 1101944108_sapp.pdf [file 1101944108_sapp.pdf]

1 **Supporting Information**

2

3 **Plasmids employed in this study**

4 Two reporter plasmids, *pSTB-CEN4* and *pSTB-CEN4'* (see Figure 1 of manuscript) were  
5 constructed for this study as follows.

6 ***pSTB-CEN4* (pCH2):** The precursor plasmid of pCH2 was pSG5-1 (1), whose main backbone  
7 fragment lacking an approximately 400 bp non-essential region was amplified by PCR using a  
8 pair of primers, each of which harbored the BglII recognition sequence. Digestion of this  
9 fragment by BglII and self ligation gave rise to pCH1-1. The *CEN4* sequence flanked by two  
10 head-to-tail copies of the R recombinase target sites was amplified as a roughly 600 bp DNA that  
11 contained a BglII site near each terminus. This fragment was cloned, after BglII digestion, into  
12 the BglII site of pCH1-1 to obtain plasmid pCH2-1. pCH2-1 was digested with Sall, and self-  
13 ligated to generate pCH2, which did not contain non-yeast sequences. This plasmid was  
14 recovered in yeast by transformation, and its authenticity was verified by Southern analysis.

15 ***pSTB-CEN4'* (pCH3):** To construct pCH3, the *CEN4* DNA was amplified by PCR into an  
16 approximately 200 bp fragment carrying a BglII site at its left and right ends. Following BglII  
17 digestion, this fragment was cloned into the BglII site of pCH1-1 (see above) to generate pCH3-  
18 1. pCH3, the self-ligation product of Sall digested pCH3-1, was introduced into yeast by  
19 transformation, and its authenticity ascertained as described for pCH2.

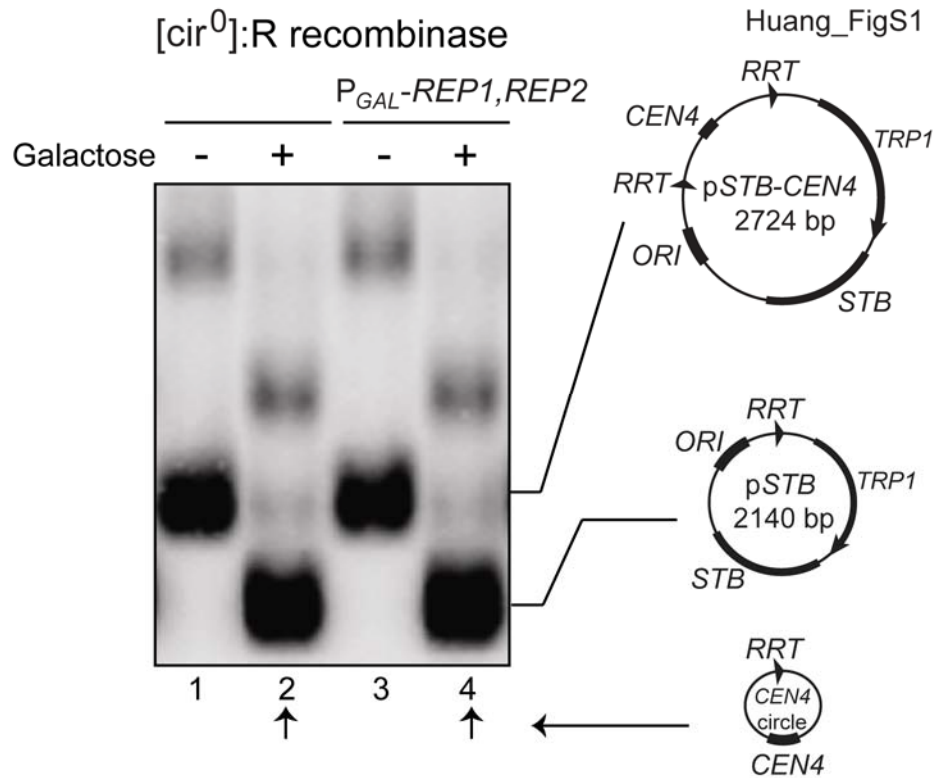

1

2 **Figure S1.** Resolution of *STB* and *CEN* into two separate circles from a parent reporter plasmid

3 harboring both these loci. The reporter plasmid *pSTB-CEN4* was resident in two matched host

4 strains, both [*cir*<sup>0</sup>] and harboring a pair of galactose inducible copies of the R recombinase gene.

5 One of the two strains was also galactose inducible for *REP1* and *REP2*. Raffinose grown cells

6 were arrested in G1 using  $\alpha$  factor (lanes 1 and 3), and were then shifted to galactose for 2 hr

7 (lanes 2 and 4) in the presence of  $\alpha$  factor. Recombination by the induced R recombinase was

8 nearly quantitative under these conditions, yielding *pSTB* and the *CEN4* circle. DNA prepared

9 from cells before and after recombinase induction was subjected to Southern analysis. The parent

10 plasmid and *pSTB* formed from it were revealed by using a radio-labeled hybridization probe

11 specific to the *TRP1* marker harbored by them. The 584 bp *CEN4* circle, which cannot hybridize

12 to this probe, migrated below the bottom of the gel section depicted here.

1

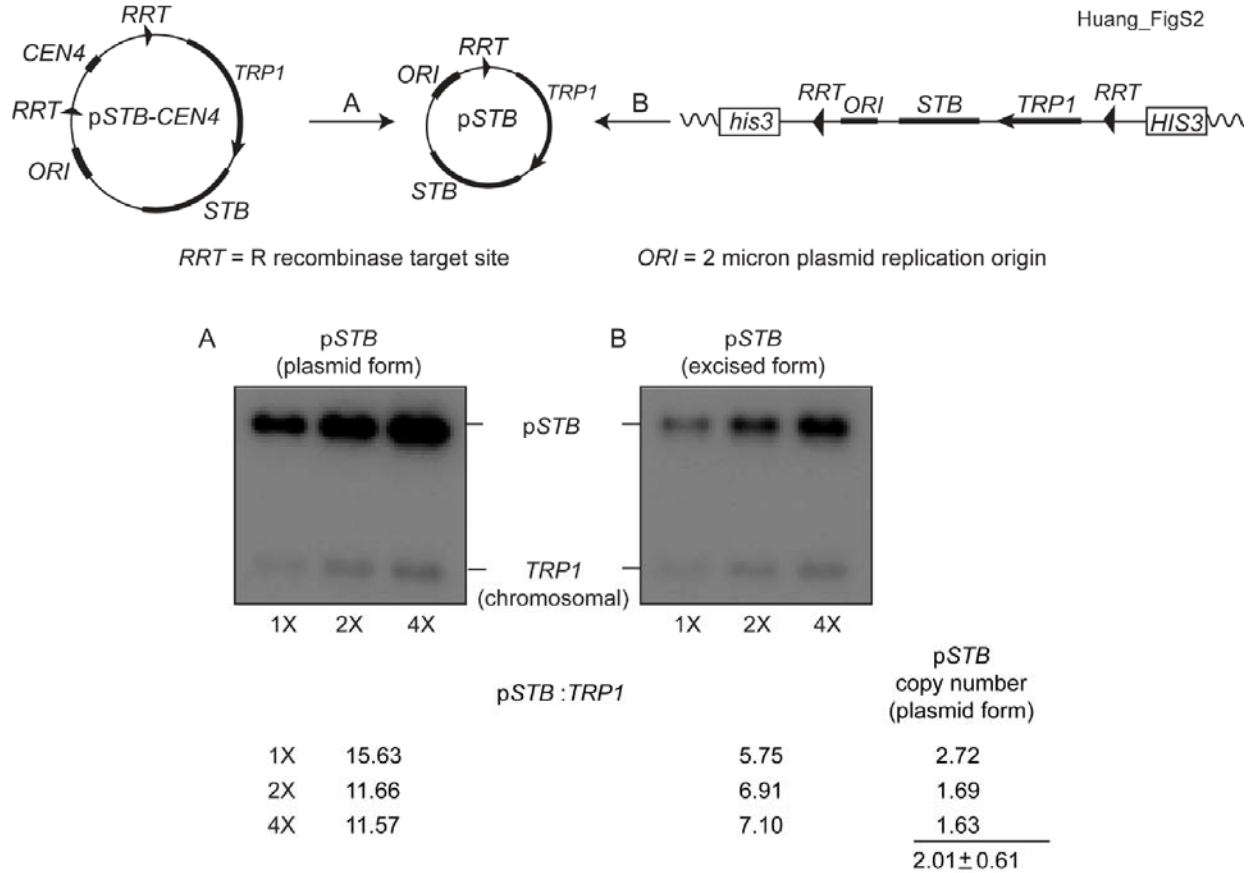

2

3 **Figure S2.** Copy number of the pSTB plasmid generated by excision of *CEN4*. For estimating  
 4 the copy number of the pSTB plasmid generated as described under Figure S1, normalization was  
 5 performed against a single copy of the linear form of the plasmid integrated at the *HIS3* locus on  
 6 chromosome XV in the [*cir*<sup>0</sup>] host strain harboring the R recombinase gene (in two copies). The  
 7 two experimental strains, one containing pSTB-CEN4 (A) and the other the integrant (B), were  
 8 arrested in G1, and the R recombinase was induced to generate pSTB, by deleting *CEN4* in one  
 9 case and excising the integrant in the other. After isolation of total DNA and EcoRI digestion,  
 10 Southern analysis was performed using a radio-labeled probe that hybridizes to *TRP1*. Intensities  
 11 of the pSTB bands were normalized against the corresponding intensities of the *TRP1* band  
 12 derived from the chromosome. The appropriate ratios of these values yielded the copy number of

- 1 *pSTB* generated from *pSTB-CEN4* as  $2.01 \pm 0.61$ . The DNA isolation procedure enriches plasmid
- 2 significantly over chromosomes, as indicated by the underrepresentation of the chromosomal
- 3 *TRP1* band.

1

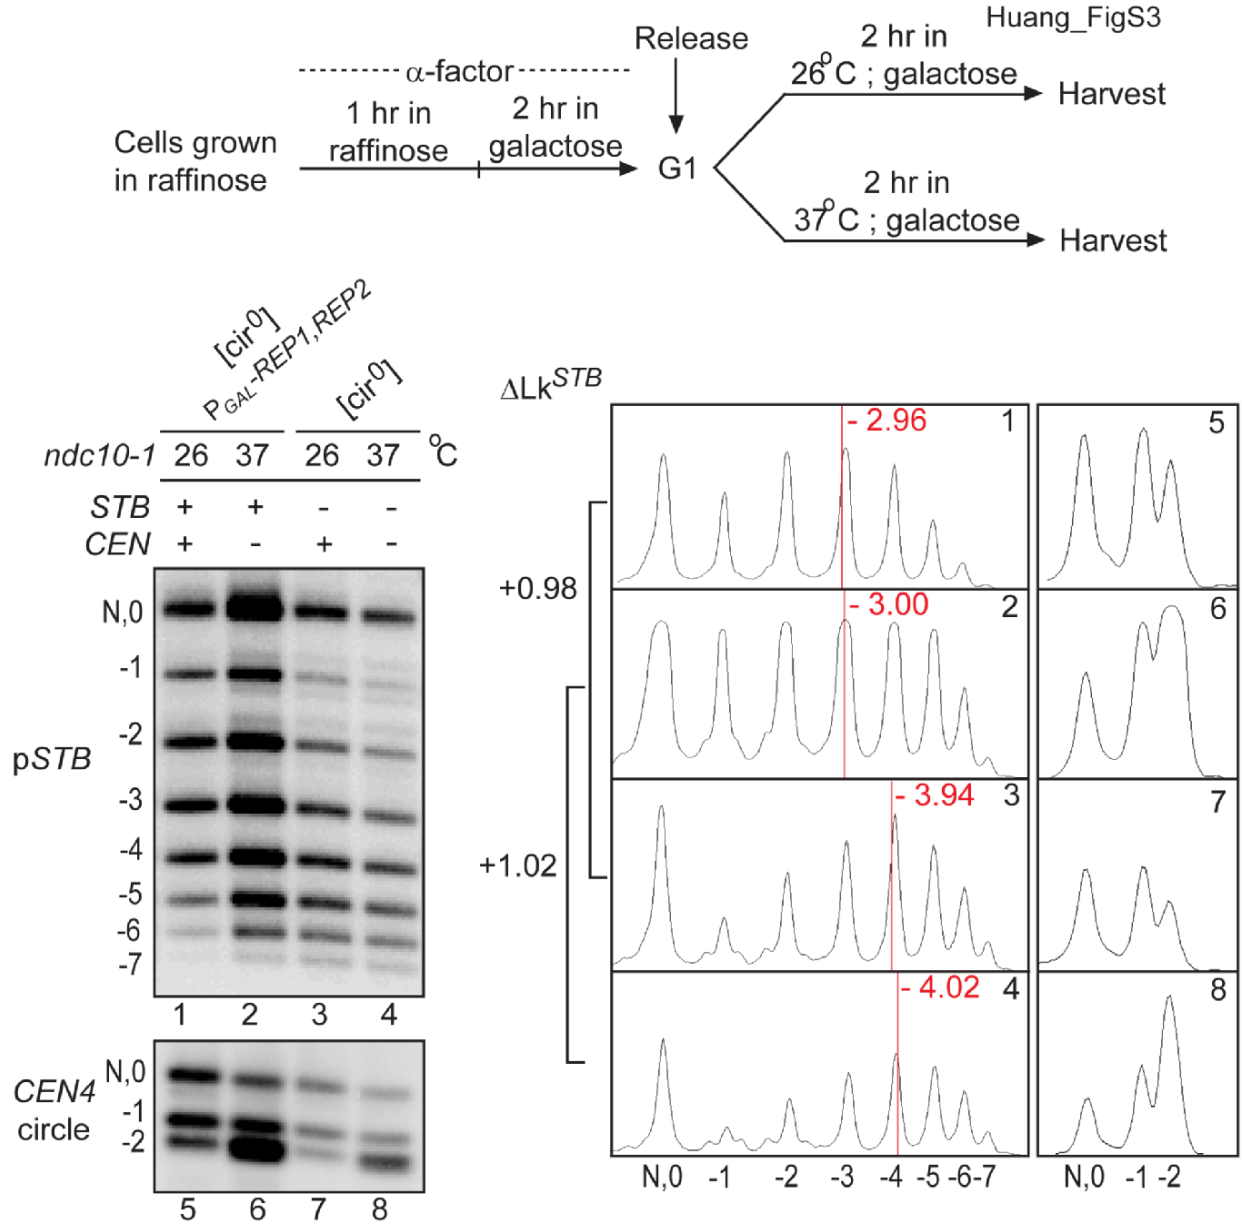

2

3 **Figure S3.** Topological analysis of the *STB* reporter plasmid and the *CEN4* circle after resolution  
 4 from their parent plasmid by recombination. The *pSTB-CEN4* plasmid (see Figure 1 of  
 5 manuscript and Figure S1) was resident in the indicated [*cir*<sup>0</sup>] *ndc10-1* strains, which also  
 6 harbored two copies of the galactose inducible R recombinase gene. The plasmid was resolved  
 7 into *pSTB* and the *CEN4* circle in G1 arrested cells by the action of R1 recombinase. Cells were

1 released from G1 arrest at 26°C or 37°C, permissive or non-permissive, respectively, for Ndc10  
2 function. DNAs obtained from metaphase cells were subjected to topological analysis by  
3 electrophoresis in a chloroquine gel (0.3 µg/ml) and Southern hybridization. The  $\Delta Lk$   
4 contributed by the active state of *STB* was derived from the plot of the band intensities shown at  
5 the right.

1

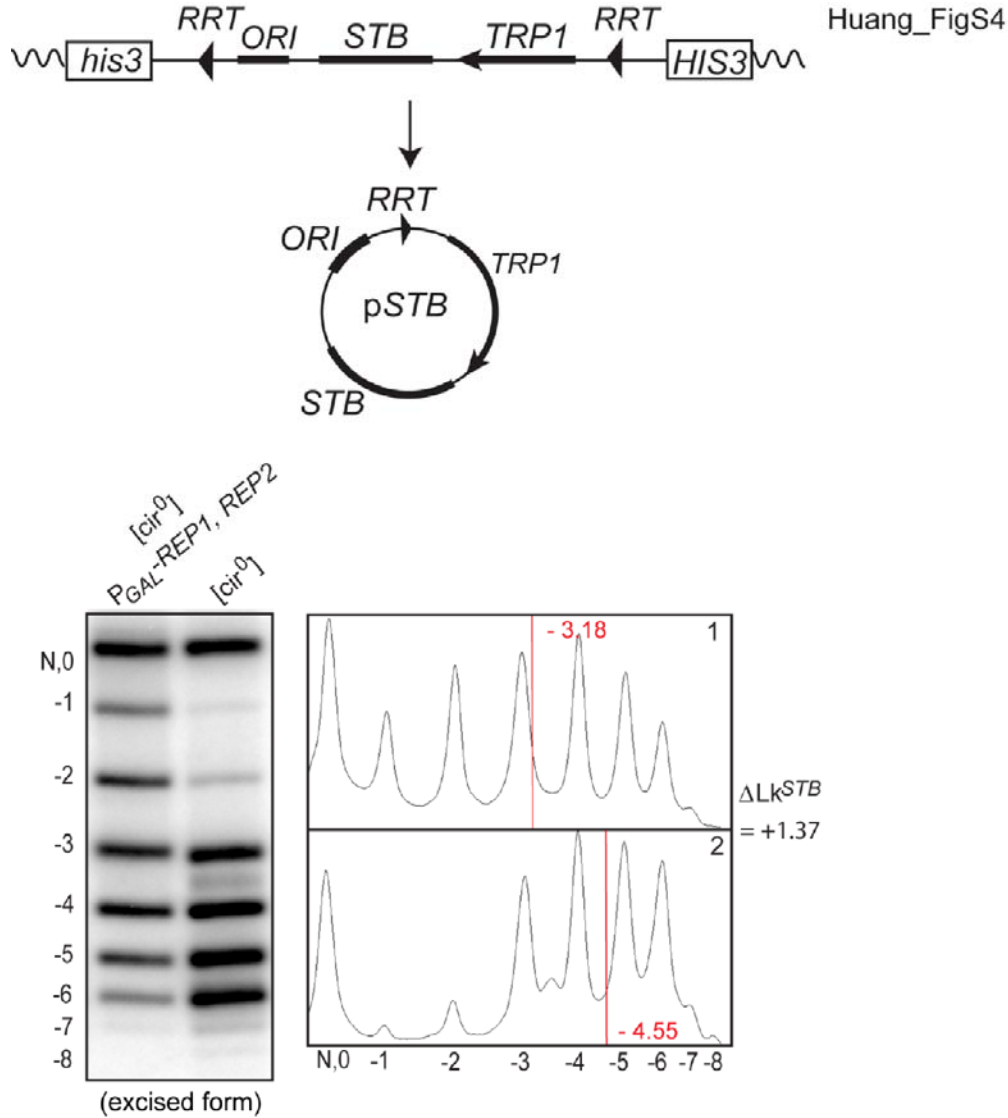

2

3 **Figure S4.** Topology of pSTB when present at a copy number of precisely one per cell. The  
4 single copy circular form of pSTB was produced in G1 cells from its linear integrated form by  
5 the recombination strategy. The topologies of the circle (excised form) in the presence or  
6 absence of Rep1 and Rep2 were analyzed at the metaphase stage of released cells. The  $\Delta Lk$  due  
7 to the functional *STB* was estimated to be 1.37 from the topoisomer distributions plotted at the  
8 right.

1 **Table S1.** Values for the linkage change between the functional and non-functional states of *STB*  
2 [ $\Delta Lk^{STB} = Lk_f - Lk_{nf}$ ] estimated from the topological assays performed in this study (Figures 2-4)  
3 are summarized. The cumulative results signifying  $\Delta Lk = +(1.35 \pm 0.23)$ , Mean  $\pm$  SD, would be  
4 consistent with the loss of one unit of positive writhe when a Cse4 containing nucleosome is  
5 removed from the plasmid-borne *STB* to be replaced in a significant subset of the molecules with  
6 a histone H3 containing nucleosome (that induces a unit of negative writhe). The DNA twist is  
7 assumed to be maintained constant between the two types of nucleosomes.

| <b>Conditions for establishing Cse4-free <i>STB</i></b> | $\Delta Lk^{STB}$ ( $Lk_f - Lk_{nf}$ ) | <b>Figures displaying relevant assays</b> |
|---------------------------------------------------------|----------------------------------------|-------------------------------------------|
| Absence of Rep1, Rep2                                   | + 1.75                                 | Figure 2                                  |
| G1 arrested cells                                       | + 1.20                                 | Figure 3                                  |
| Nocodazole treated cells                                | + 1.25                                 | Figure 3                                  |
| Absence of Rep1, Rep2                                   | + 1.23<br>+ 1.32                       | Figure 4                                  |
|                                                         | + (1.35 $\pm$ 0.23)                    |                                           |

8



1 **Table S2.** Yeast strains employed for this study. The genotypes of the experimental strains used  
2 in the present study are listed. The absence of endogenous 2 micron circles in a strain is denoted  
3 by the [cir<sup>0</sup>] designation. Reporter plasmids harbored by the strains are indicated. These plasmids  
4 are schematically drawn in Figure 1 of the manuscript, and their constructions are described  
5 above. The strain MJY9001 contained a copy of the pSTB plasmid integrated at the *HIS3* locus.  
6 The circular form of pSTB could be generated by the R recombinase mediated deletion reaction  
7 between a pair of target DNA sites in head-to-tail orientation.

| Strains | Genotype                                                                                                                                                                |
|---------|-------------------------------------------------------------------------------------------------------------------------------------------------------------------------|
| MJY5778 | <i>MATa ade2-1 can1-100 his3-11,15 trp1-1 ura3-1 leu2::(P<sub>GAL</sub>-RecR::LEU2)X2 [cir<sup>0</sup>, pSTB-CEN4]</i>                                                  |
| MJY5808 | <i>MATa ade2-1 can1-100 trp1-1 ura3-1 leu2::(P<sub>GAL</sub>-RecR::LEU2)X2 his3-11,15::P<sub>GAL</sub>-REP1,REP2::HIS3 [cir<sup>0</sup>, pSTB-CEN4]</i>                 |
| MJY5751 | <i>MATa ade2-1 leu2-3,112 his3-11,15 trp1-1 can1-100 ura3-1::CSE4-MYC12::URA3 ndc10-1 [cir<sup>0</sup>, pSTB-CEN4]</i>                                                  |
| MJY5761 | <i>MATa ade2-1 leu2-3,112 trp1-1 can1-100 ura3-1::CSE4-MYC12::URA3 his3-11,15::P<sub>GAL</sub>-REP1,REP2::HIS3 ndc10-1 [cir<sup>0</sup>, pSTB-CEN4]</i>                 |
| MJY5839 | <i>MATa ade2-1 can1-100 his3-11 trp1-1 ura3-1 leu2::(P<sub>GAL</sub>-RECR::LEU2)X2 his3-11,15::P<sub>GAL</sub>-REP1,REP2::HIS3 ndc10-1 [cir<sup>0</sup>, pSTB-CEN4]</i> |
| MJY5840 | <i>MATa ade2-1 can1-100 his3-11,15 trp1-1 ura3-1 leu2::(P<sub>GAL</sub>-RECR::LEU2)X2 ndc10-1 [cir<sup>0</sup>, pSTB-CEN4]</i>                                          |
| MJY9001 | <i>MATa ade2-1 can1-100 leu2::(P<sub>GAL</sub>-RecR::LEU2)X2 his3-11,15::pSTB::HIS3 ura3-1::P<sub>GAL</sub>-REP1,REP2::URA3 [cir<sup>0</sup>]</i>                       |

8

9 **Reference**

10 1. Ghosh SK, Huang CC, Hajra S, Jayaram M (2010) Yeast cohesin complex embraces 2 micron  
11 plasmid sisters in a tri-linked catenane complex. *Nucleic Acids Res* 38: 570-584.
